# Supplementary material
Source: Springer Nature journal article supplement (https://www.springermedizin.de/resource/supplementary/12889_2008_1269_MOESM3_ESM.pdf/9502824)

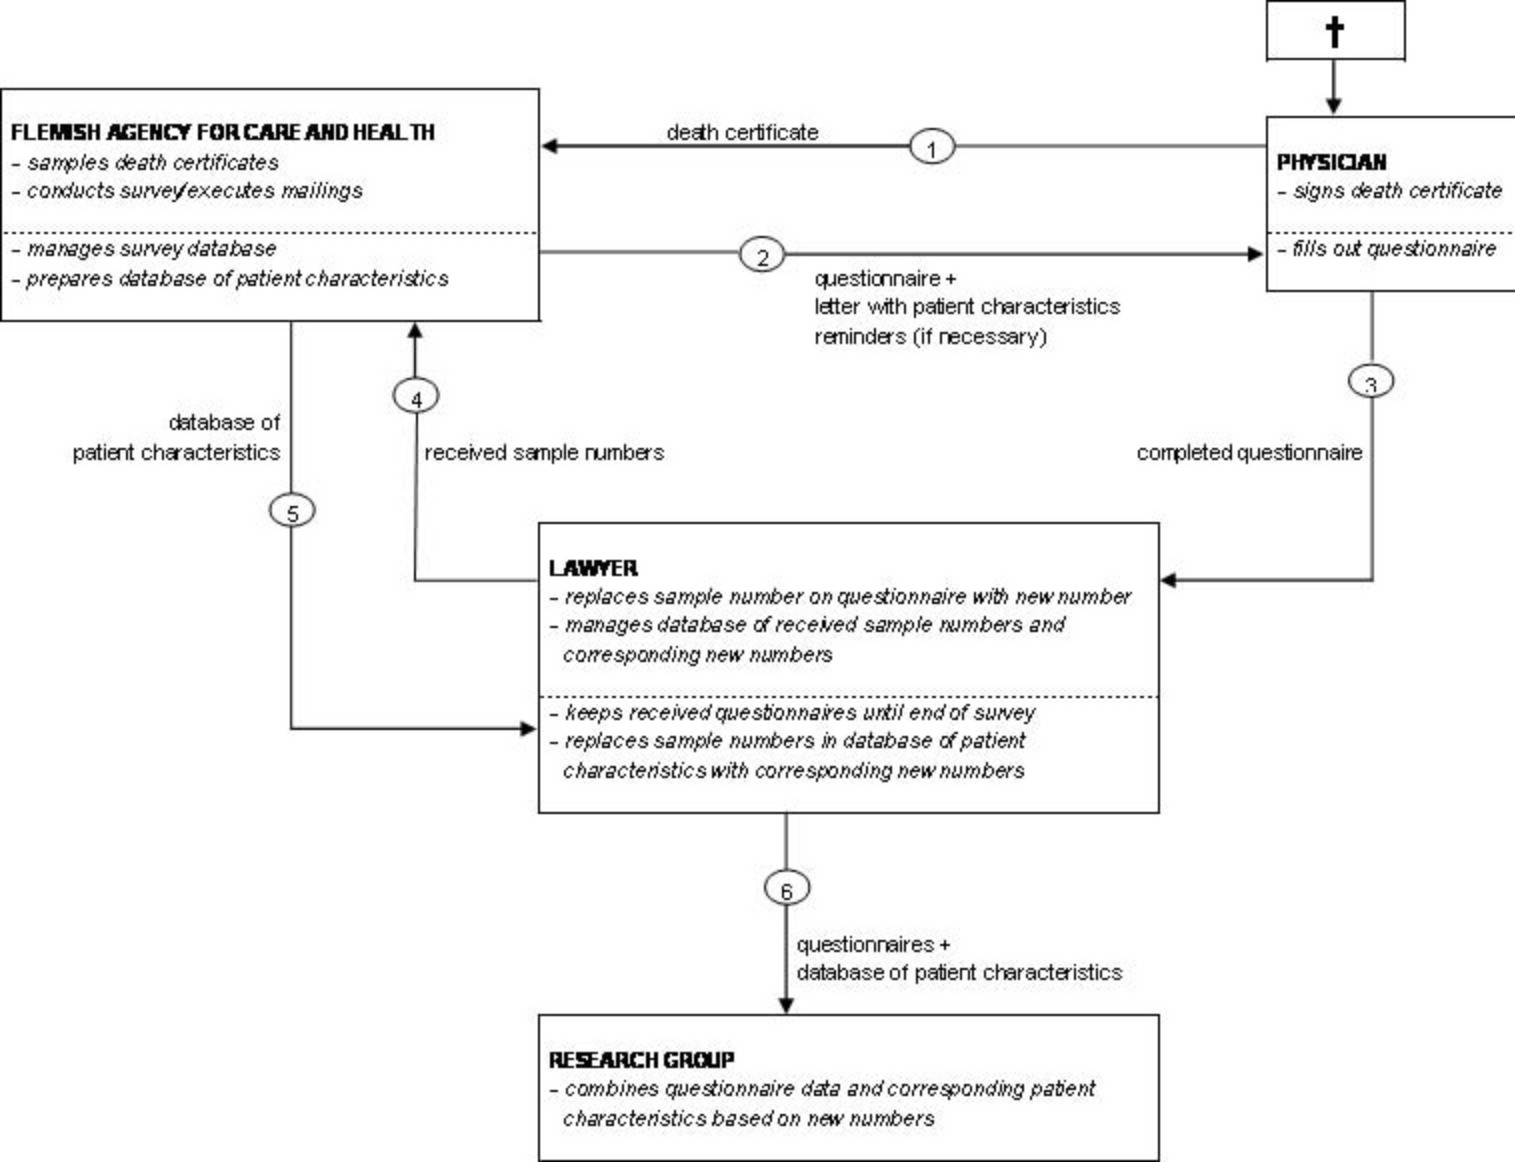

Supplement: MOESM3 [file 9502824]
